# Supplementary material for: 5′-tiRNA-Cys-GCA regulates VSMC proliferation and phenotypic transition by targeting STAT4 in aortic dissection
Source: PubMed Central journal article supplement — Mol Ther Nucleic Acids. 2021 Jul 29;26:295–306. doi: 10.1016/j.omtn.2021.07.013 (PMC8413832; doi:10.1016/j.omtn.2021.07.013), 2021-07-29
Supplement: mmc1.pdf [file mmc1.pdf]

OMTN, Volume 26

## **Supplemental information**

### **5'-tiRNA-Cys-GCA regulates VSMC proliferation and phenotypic transition by targeting STAT4 in aortic dissection**

**Tingyu Zong, Yanyan Yang, Xiaotong Lin, Shaoyan Jiang, Hui Zhao, Meixin Liu, Yuanyuan Meng, Yong Li, Liang Zhao, Guozhang Tang, Kun Gong, Zhibin Wang, and Tao Yu**

**Table S1 Oligonucleotides used in this study**

| <b>Definition</b>             | <b>Sequence (5'-3')</b>                                                                    |
|-------------------------------|--------------------------------------------------------------------------------------------|
| 5'-tiRNA-Cys-GCA mimics       | Sense: GCAGUCAAAUGCUCUACCACUGAGCUAUACCCCC<br>Antisense: GGGUAUAGCUCAGUGGUAGAGCAUUUGACUGCUU |
| 5'-tiRNA-Cys-GCA mimics NC    | Sense: UUCUCCGAACGUGUCACGUTT<br>Antisense: ACGUGACACGUUCGGAGAATT                           |
| 5'-tiRNA-Cys-GCA inhibitor    | GGGGGUAUAGCUCAGUGGUAGAGCAUUUGACUGC                                                         |
| 5'-tiRNA-Cys-GCA inhibitor NC | CAGUACUUUUGUGUAGUACAA                                                                      |
| si-STAT4                      | Sense: CCUGCCACAUUGAGUCAACUATT<br>Antisense: UAGUUGACUCA AUGUGGCAGGTT                      |
| si-STAT4 NC                   | Sense: UUCUCCGAACGUGUCACGUTT<br>Antisense: ACGUGACACGUUCGGAGAATT                           |

**Table S2 Primers used in this study**

| <b>Primer</b>    | <b>Sequence (5'-3')</b>   |
|------------------|---------------------------|
| 5'-tiRNA-Cys-GCA | GCAGTCAAATGCTCTACCACTG    |
| STAT4-Forward    | CCTGACATTCCCAAAGACAAAGC   |
| STAT4- Reverse   | TCTCTCAACACCGCATAACACAC   |
| PCNP-Forward     | CAACAAAGCCTACAAAGATCTCCAA |
| PCNP-Reverse     | AGCTGCTGCTACTGAAAGAGTTTTT |
| CRISPLD2-Forward | CGGACGAGATGAATGAGGTG      |
| CRISPLD2-Reverse | TGACCGCAGAGGTT TTCTTG     |
| U6-Forward       | GGAACGATACAGAGAAGATTAGC   |
| U6- Reverse      | TGGAACGCTTCACGAATTTGCG    |
| GAPDH-Forward    | AAGAAGGTGGTGAAGCAGGC      |
| GAPDH-Reverse    | TCCACCACCCAGTTGCTGTA      |

Figure S1

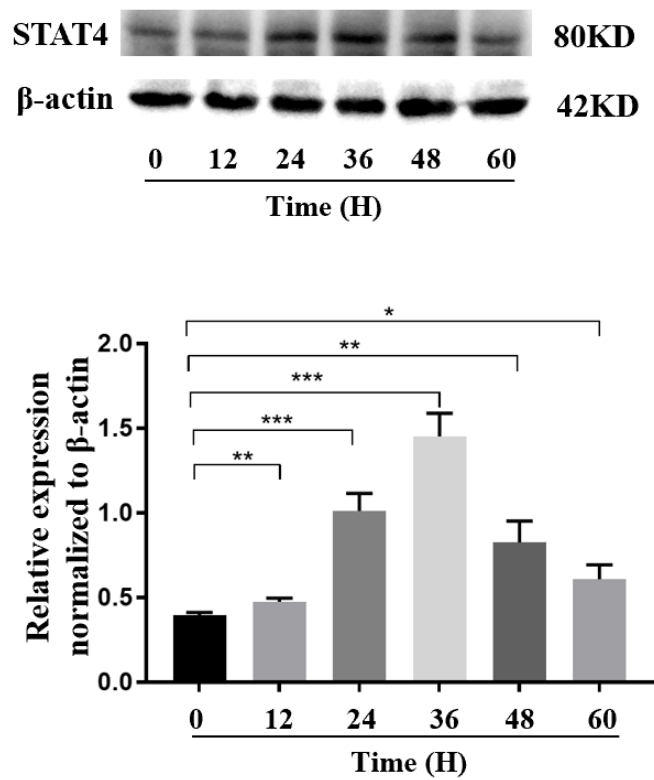

Figure S1. Western blotting analyses were conducted to measure the protein expression level of STAT4 after knockdown of 5'-tiRNA-Cys-GCA in VSMCs. Data are presented as mean  $\pm$  SD. Each experiment was repeated at least three times. \*p < 0.05; \*\*p < 0.01; \*\*\*p < 0.001; \*\*\*\*p < 0.0001; ns, not significant.

Figure S2

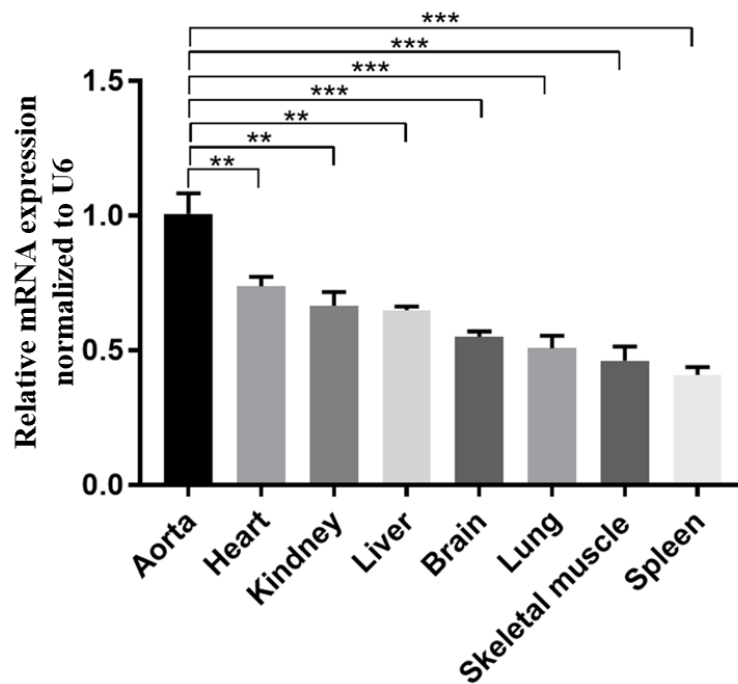

Figure S2. RT-qPCR was used to detect the expression level of 5'-tRNA-Cys-GCA in various organs of mice. Data are presented as mean  $\pm$  SD. Each experiment was repeated at least three times. \* $p < 0.05$ ; \*\* $p < 0.01$ ; \*\*\* $p < 0.001$ ; \*\*\*\* $p < 0.0001$ ; ns, not significant.
